# Supplementary material for: Network Security Via Explicit Consent
Source: MDPI journal article supplement (doi:10.3390/jcm10215109), 2009-01-01
Supplement: s1 [file s1]

**Table S1.** Cognitive covariates.

| Test                                                         | Cognitive domain                                                        | Measures                                                                                                                                                |
|--------------------------------------------------------------|-------------------------------------------------------------------------|---------------------------------------------------------------------------------------------------------------------------------------------------------|
| Trail Making Test (TMT)                                      |                                                                         |                                                                                                                                                         |
| TMT A                                                        | Attention and processing speed                                          | Time (in secs) taken to draw lines between 25 numbers in sequence                                                                                       |
| TMT B                                                        | Attention, processing speed and task switching<br>Cognitive flexibility | Time (in secs) taken to draw lines in alternating sequence between 25 letters and numbers                                                               |
| Rey Auditory Verbal Learning Test (RAVLT)                    |                                                                         | Number of words recalled from a list of 15 unrelated words read out by the assessor                                                                     |
| RAVLT Immediate recall                                       | Verbal short-term memory                                                | Sum of the first 5 trials                                                                                                                               |
| RAVLT Interference recall                                    | Interference                                                            | Trial 6 after an interference list                                                                                                                      |
| RAVLT Delayed recall                                         | Verbal long-term memory                                                 | Trial 7 after 20 minutes                                                                                                                                |
| RAVLT Learning rate                                          | Verbal learning                                                         | Trial 5 minus trial 1                                                                                                                                   |
| RAVLT Forgetting rate                                        | Consolidation verbal information                                        | Trial 5 minus delayed recall (trial 7)                                                                                                                  |
| Cambridge Neuropsychological Test Automated Battery (CANTAB) |                                                                         |                                                                                                                                                         |
| CANTAB SWM: Spatial working memory                           | Spatial working memory                                                  | Find hidden tokens in displayed boxes. Outcome measure: the number of times a box is selected in which a token was already presented (number of errors) |
| CANTAB PAL: Paired associate learning                        | Visual learning and memory                                              | Number of errors, adjusted for the estimated number of errors that could have been made on any problems, attempts and unfinished items                  |
| CANTAB RVP: Rapid visual information processing              | Sustained attention and concentration                                   | Detect specific sequences by pushing a button. Outcome measure: the accuracy of target detection calculated from hits and correct rejections            |

|                                         |                                      |                                                                                                                                                                                                                                                                                    |
|-----------------------------------------|--------------------------------------|------------------------------------------------------------------------------------------------------------------------------------------------------------------------------------------------------------------------------------------------------------------------------------|
| CANTAB SOC: Stockings of Cambridge task | Spatial planning and problem solving | Number of occasions upon which the participant successfully completes a test problem in the minimum possible number of moves                                                                                                                                                       |
| CANTAB RTI : Choice Reaction Time       | Processing speed                     | Median duration (in secs) between the onset of the stimulus and the time at which the button is released                                                                                                                                                                           |
| CANTAB AST: Attention Switching Task    | Attention, task switching            | Difference between the median latency of responses between assessments in the trial block in which the rule was switched vs those in the trial block in which the rule remained constant. Close to zero indicates less variation in latencies across non-switch and switch trials. |

**Table S2.** Participant characteristics of the study sample and the participants with incomplete follow-up (FU) data.

| Demographic characteristics                     | Study sample<br><i>n</i> = 671 | Participants with<br>incomplete FU<br><i>n</i> = 1401 | <i>p</i> |
|-------------------------------------------------|--------------------------------|-------------------------------------------------------|----------|
| Age (years)                                     | 49 (31–61)                     | 50 (30–66)                                            | 0.021    |
| > 65 years                                      | 102/671 (15.2)                 | 357/1401 (25.5)                                       | < 0.001  |
| Male                                            | 463/671 (69.0)                 | 959/1401 (68.5)                                       | 0.77     |
| Highest educational level:                      |                                |                                                       |          |
| College/University                              | 188/614 (30.6)                 | 268/1183 (22.7)                                       | 0.007    |
| Married or living with partner                  | 369/648 (56.9)                 | 669/1401 (47.8)                                       | <0.001   |
| <b>Injury-related characteristics</b>           |                                |                                                       |          |
| Glasgow Coma Scale:                             |                                |                                                       |          |
| Mild TBI (13–15)                                | 474/671 (70.6)                 | 1015/1401 (72.5)                                      | 0.72     |
| Moderate TBI (9–12)                             | 67/671 (10.0)                  | 135/1401 (9.6)                                        |          |
| Severe TBI (3–8)                                | 130/671 (19.4)                 | 251/1401 (17.9)                                       |          |
| Cause of injury:                                |                                |                                                       |          |
| Road traffic incident                           | 321/656 (48.9)                 | 527/1314 (40.1)                                       |          |
| Incidental fall                                 | 244/656 (37.2)                 | 651/1314 (49.5)                                       | <0.001   |
| Violence /Assault /Mass violence                | 24/656 (3.7)                   | 71/1314 (0.5)                                         |          |
| Suicide attempt                                 | 12/656 (1.8)                   | 9/1314 (0.7)                                          |          |
| Care pathway:                                   |                                |                                                       |          |
| Admitted to hospital                            | 320/671 (47.7)                 | 731/1401 (52.2)                                       | 0.052    |
| Intensive Care Unit                             | 351/671 (52.3)                 | 670/1401 (47.8)                                       |          |
| <b>Psychiatric history<sup>1</sup></b>          |                                |                                                       |          |
| Depression                                      | 37/68 (54.4)                   | 112/196 (57.1)                                        | 0.70     |
| Anxiety                                         | 18/68 (26.5)                   | 55/196 (28.1)                                         | 0.80     |
| Sleep disorder                                  | 11/68 (16.2)                   | 20/196 (10.2)                                         | 0.19     |
| Substance abuse                                 | 8/68 (11.8)                    | 53/196 (27.0)                                         | 0.010    |
| <b>Psychiatric characteristics at follow up</b> |                                |                                                       |          |
| PCL-5 <sup>2</sup> total score 6mo              | 8 (3–18)                       | 8 (2–17)                                              | 0.28     |
| PTSD probable diagnosis 6mo                     | 79/671 (11.8)                  | 70/804 (8.7)                                          | 0.052    |
| PCL-5 total score 12mo                          | 8 (2–18)                       | 7 (2–15)                                              | 0.049    |
| PTSD probable diagnosis 12mo                    | 71/671 (10.6)                  | 53/574 (9.2)                                          | 0.47     |
| PHQ-9 <sup>3</sup> total score 6mo              | 3 (1–7)                        | 3 (1–8)                                               | 0.46     |
| GAD-7 <sup>4</sup> total score 6mo              | 2 (0–5)                        | 2 (0–5)                                               | 0.20     |

Median, interquartile range and Mann-Whitney tests were used for age, PCL-5, PHQ-9, GAD-7. Frequency (*n*, %) and Pearson's Chi<sup>2</sup> test for the other variables. <sup>1</sup> Information on psychiatric history and type(s) of psychiatric disorder was obtained during the interview with the patient and/or caretaker upon hospital admission. <sup>2</sup> PCL-5 is Posttraumatic Stress Disorder Checklist-5, <sup>3</sup> PHQ-9 is Patient Health Questionnaire-9 and screens for depressive symptoms, <sup>4</sup> GAD-7 is Generalized Anxiety Disorder-7 and screens for anxiety symptoms.

**Table S3.** Descriptive statistics for the PCL-5 total scores at 6 and 12 months, differentiated for PTSD at 6 months.

|                | Total sample<br><i>n</i> = 671 |     |               | PTSD 6mo<br><i>n</i> = 79 |     |               | No PTSD 6mo<br><i>n</i> = 592 |     |              | <i>t</i> ( <i>df</i> ) | Hedges' <i>g</i> | <i>p</i> |
|----------------|--------------------------------|-----|---------------|---------------------------|-----|---------------|-------------------------------|-----|--------------|------------------------|------------------|----------|
|                | Min                            | Max | Mean (SD)     | Min                       | Max | Mean (SD)     | Min                           | Max | Mean (SD)    |                        |                  |          |
| PCL-5 at 6 mo  | 0                              | 68  | 12.74 (13.56) | 19                        | 68  | 41.01 (10.99) | 0                             | 50  | 8.97 (8.45)  | -24.94 (90.71)         | 3.65             | <0.001   |
| PCL-5 at 12 mo | 0                              | 79  | 12.54 (13.89) | 6                         | 79  | 32.27 (16.87) | 0                             | 57  | 9.91 (11.05) | -11.46 (87.14)         | 1.88             | <0.001   |

Independent-samples *t*-tests were conducted to compare PCL-5 scores in the PTSD and no-PTSD groups, assuming unequal variances. Effect sizes were calculated using Hedges' *g* because of the different sample sizes.

**Table S4.** Descriptive statistics for the PCL-5 cluster change scores differentiated for PTSD at 6 months.

| Cluster   | Range | PTSD 6mo<br><i>n</i> = 79 |     |               | No PTSD 6mo<br><i>n</i> = 592 |     |             | <i>t</i> | <i>df</i> | Hedges' <i>g</i> | <i>p</i> |
|-----------|-------|---------------------------|-----|---------------|-------------------------------|-----|-------------|----------|-----------|------------------|----------|
|           |       | Min                       | Max | Mean (SD)     | Min                           | Max | Mean (SD)   |          |           |                  |          |
| Total     | 0–80  | –20                       | 45  | –8.75 (14.06) | –41                           | 35  | 0.94 (8.57) | 5.98     | 85.89     | 1.03             | <0.001   |
| Intrusion | 0–20  | –12                       | 11  | –2.27 (4.69)  | –8                            | 17  | 0.26 (2.66) | 4.69     | 84.80     | 0.85             | <0.001   |
| Avoidance | 0–8   | –6                        | 5   | –1.13 (2.31)  | –6                            | 8   | 0.14 (1.47) | 4.76     | 86.60     | 0.80             | <0.001   |
| Cogn/Mood | 0–28  | –20                       | 14  | –2.92 (5.70)  | –15                           | 24  | 0.30 (4.16) | 4.85     | 89.39     | 0.74             | <0.001   |
| Arousal   | 0–24  | –14                       | 8   | –2.44 (4.67)  | –11                           | 15  | 0.23 (3.00) | 4.95     | 86.75     | 0.82             | <0.001   |

Independent-samples *t*-tests were conducted to compare PCL-5 change scores in the PTSD and no-PTSD groups, assuming unequal variances. Effect sizes were calculated using Hedges' *g* because of the different sample sizes.

**Table S5.** Linear Regression: Covariates Associated with PCL-5 Change Scores in Participants with a Probable PTSD Diagnosis ( $n = 79$ ). .

| Covariate                              | B     | SE (B) | 95% CI <sup>1</sup> |                 | $p^4$  | VIF <sup>5</sup> |
|----------------------------------------|-------|--------|---------------------|-----------------|--------|------------------|
|                                        |       |        | LL <sup>2</sup>     | UL <sup>3</sup> |        |                  |
| (Intercept)                            | 12.61 | 8.34   | -4.02               | 29.23           | 0.15   |                  |
| Age                                    | -0.15 | 0.11   | -0.37               | 0.069           | 0.18   | 1.37             |
| Psychiatric history                    | 4.19  | 4.06   | -3.91               | 12.28           | 0.31   | 1.06             |
| GCS <sup>6</sup>                       | -0.81 | .45    | -1.71               | 0.09            | 0.078  | 1.23             |
| CANTAB PAL <sup>7</sup>                | 6.31  | 1.77   | 2.78                | 9.84            | 0.001  | 1.70             |
| RAVLT-Interference recall <sup>8</sup> | 22.98 | 5.66   | 11.69               | 34.27           | <0.001 | 1.79             |
| GCS x RAVLT- Interference recall       | -1.37 | 0.42   | -2.20               | -0.54           | 0.002  |                  |

<sup>1</sup> CI = confidence interval; <sup>2</sup> LL = lower limit; <sup>3</sup> UL = upper limit; <sup>4</sup> significance level  $p < 0.01$ ; <sup>5</sup> VIF = variance inflation factor; <sup>6</sup> GCS = Glasgow Coma Scale; <sup>7</sup> CANTAB PAL = Cambridge Neuropsychological Test Automated Battery - Paired Associate Learning Test (high scores reflect weak visual learning and memory); <sup>8</sup> RAVLT Interference recall = Rey Auditory Verbal Learning Test – Interference recall (high scores reflect strong short-term memory), high PCL-5 change scores reflect worsening symptoms. The interaction effect for the PCL-5 change score and RAVLT-Interference recall was significant (RAVLT-Interference in mild TBI:  $B = 3.77$ ,  $SE(B) = 2.00$ ,  $p = 0.064$ , moderate TBI:  $B = 8.57$ ,  $SE(B) = 2.15$ ,  $p < 0.001$ , and severe TBI:  $B = 15.43$ ,  $SE(B) = 3.59$ ,  $p < 0.001$ ).

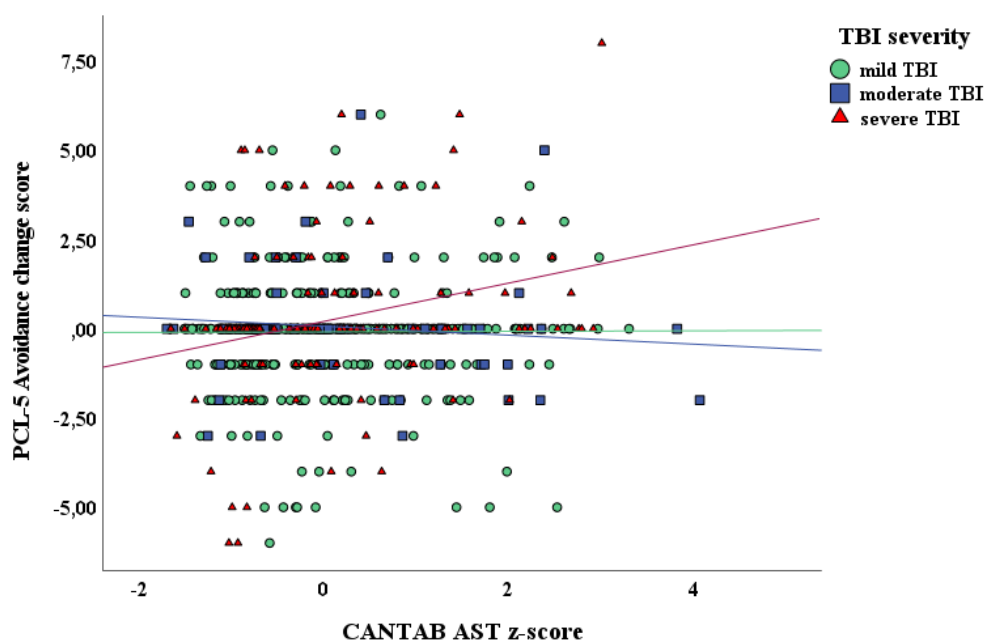

**Figure S1.** Scatterplot of the PCL-5 avoidance change scores and the CANTAB AST differentiated for Glasgow Coma Scale.

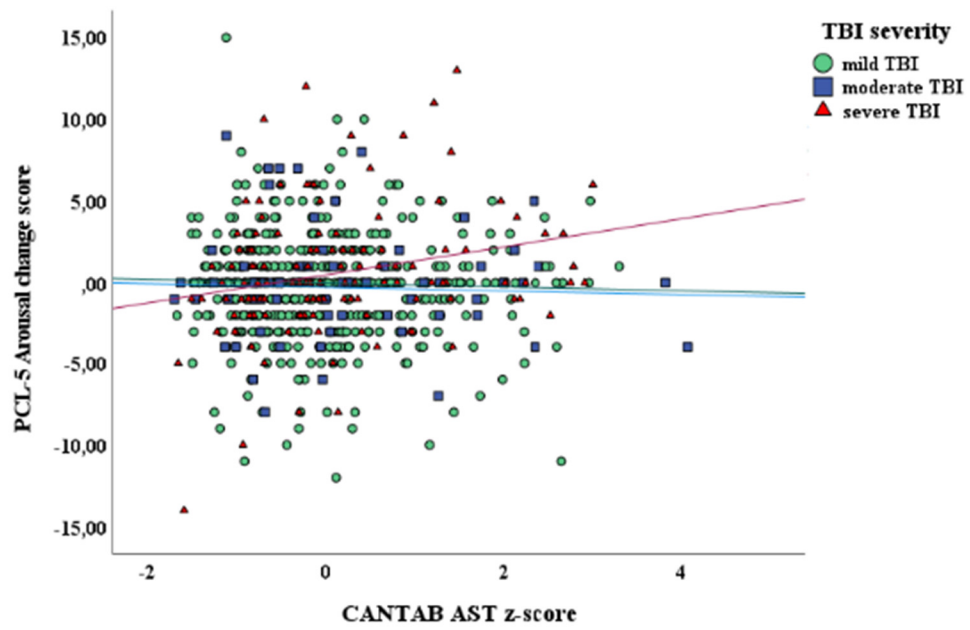

**Figure S2.** Scatterplot of the PCL-5 arousal change scores and the CANTAB AST differentiated for Glasgow Coma Scale.
